# Supplementary material
Source: PubMed Central journal article supplement (PMC3706092)
Supplement: NIHMS238201-supplement-06.pdf [file NIHMS238201-supplement-06.pdf]

### QTc values of patients carrying a heterozygous R231C mutation

| Family:subject | Treatment   | RR   | QT  | QTc (msec) | Rhythm |
|----------------|-------------|------|-----|------------|--------|
| A I:1          | -           | 1003 | 383 | 382        | AF     |
| A II:1         | nadolol     | 920  | 400 | 417        | SR     |
| A II:1         | sotalol     | 790  | 420 | 473        | SR     |
| A II:3         | flecainide  | 1010 | 370 | 368        | SR     |
| A II:4         | no          | 1010 | 400 | 398        | SR     |
| A II:5         | no          | 920  | 390 | 407        | AF     |
| A II:5         | sotalol     | 1050 | 420 | 410        | AF     |
| B I:2          | -           | 769  | 388 | 442        | SR     |
| B II:1         | -           | 800  | 380 | 425        | SR     |
| B II:2         | -           | 720  | 360 | 424        | SR     |
| B II:3 day 1   | -           | 870  | 469 | 503        | SR     |
| C II:2         | -           | 937  | 470 | 486        | SR     |
| D II:1         | -           | 620  | 340 | 432        | SR     |
| D III:1 day 1  | -           | 923  | 506 | 527        | SR     |
| E II:1         | -           | 1000 | 460 | 460        | SR     |
| E II:2         | -           | 1000 | 480 | 480        | SR     |
| E III:1 day 1  | -           | 638  | 435 | 545        | SR     |
| E III:2        | propranolol | 706  | 400 | 476        | SR     |
| F I:2          |             | 882  | 442 | 471        | SR     |

RR, QT were measured on leads II of the available ECGs, and QTc calculated using Bazett formula

AF: atrial fibrillation, SR: sinus rhythm.

Supplemental Table 1
